# Supplementary material for: Effects of FGFR inhibitors TKI258, BGJ398 and AZD4547 on breast cancer cells in 2D, 3D and tissue explant cultures
Source: PubMed Central journal article supplement (PMC7907049; doi:10.1007/s13402-020-00562-0), 2020-10-29

## Supplementary Files to:

### Effects of FGFR inhibitors TKI258, BGJ398 and AZD4547 on breast cancer cells in 2D, 3D and tissue explant cultures

Kähkönen TE<sup>1</sup>, Toriseva M<sup>1,2</sup>, Petruk N<sup>1,2</sup>, Virta A-R<sup>1</sup>, Maher A<sup>1</sup>, Eigélienė N<sup>1</sup>, Kaivola J<sup>1</sup>, Boström P<sup>3</sup>, Koskivuo I<sup>4</sup>, Nees M<sup>1,5</sup>, Tuomela JM<sup>1,2</sup>, Ivaska KK<sup>1</sup> and Härkönen PL<sup>1,2</sup>.

<sup>1</sup> University of Turku, Institute of Biomedicine, 20520 Turku, Finland

<sup>2</sup> FICAN West Cancer Centre, Turku, 20520 Turku, Finland

<sup>3</sup> Turku University Hospital, Department of Pathology, 20520 Turku, Finland

<sup>4</sup> Turku University Hospital, Department of Plastic and General Surgery, 20520 Turku, Finland

<sup>5</sup> Uniwersytet Medyczny w Lublinie, Dept. of Biomedicine and Molecular Biology II, 20-095 Lublin, Poland

#### Corresponding author:

Pirkko Härkönen, Institute of Biomedicine, University of Turku, Kiinamylynkatu 10, 20520 Turku, Finland, Email: [harkonen@utu.fi](mailto:harkonen@utu.fi)

**Supplementary Table S1.**

**FGFRis used in the study.** The IC<sub>50</sub> values (nM) for the non-selective FGFRi TKI258 and the FGFR selective inhibitors BGJ398 and AZD4547. The dash symbol (‘ - ‘) refers to no binding to the receptor. The IC<sub>50</sub> values are summarized in the following publications: [5] Katoh 2016, [7] Katoh and Nagama 2014, [20] Babina and Turner 2017.

| <b>Inhibitor</b> | <b>IC<sub>50</sub> (nM)</b> |              |              |              |                                                                                                                         | <b>References</b>                                             |
|------------------|-----------------------------|--------------|--------------|--------------|-------------------------------------------------------------------------------------------------------------------------|---------------------------------------------------------------|
|                  | <b>FGFR1</b>                | <b>FGFR2</b> | <b>FGFR3</b> | <b>FGFR4</b> | <b>Other targets</b>                                                                                                    |                                                               |
| <b>TKI258</b>    | 8                           | 40           | 9            | -            | VEGFR1 (10 nM), VEGFR2 (13 nM), VEGFR3 (8 nM), Kit (2 nM), CSF1R (36 nM), FLT3 (1 nM), PDGFRA (~200 nM), PDGFRB (27 nM) | Katoh and Nagama 2014<br>Katoh 2016<br>Babina and Turner 2017 |
| <b>BGJ398</b>    | 0.9                         | 1.4          | 1            | 60           | -                                                                                                                       | Katoh 2016                                                    |
| <b>AZD4547</b>   | 0.2                         | 1.8          | 2.5          | 165          | VEGFR2 (24 nM), Kit (24 nM), CSF1R (9.7 nM), FLT3 (85 nM), IGFR (518 nM)                                                | Katoh and Nagama 2014<br>Katoh 2016<br>Babina and Turner 2017 |

**Supplementary Table S2.****Primer sequences and information about primary and secondary antibodies used in the study.**

| <b>Gene</b> | <b>Forward primer sequence</b>    | <b>Reverse primer sequence</b>    |
|-------------|-----------------------------------|-----------------------------------|
| FGFR1       | 5'-TGG CAC CCG AGG CAT TAT TT-3'  | 5'-CAT GTA CAG CTG GTT GTT GC-3'  |
| FGFR2       | 5'-AAC AGT CAT CCT GTG CCG AA-3'  | 5'-AGC CGA AAC TGT TAC CTG TC-3'  |
| FGFR3       | 5'-CGT CCA CCG ACG AGT ACC T-3'   | 5'-CTC ACA TTG TTG GGG ACC AGT-3' |
| FGFR4       | 5'-CTG ACA CAG TGC TCG ACC TT-3'  | 5'-AAC CCT GAC ATT TGG GCC AT-3'  |
| beta-actin  | 5'-CGT GGG GCG CCC CAG' GCA CCA-3 | 5'-TTG GCC TTG GGG TTC AGG GGG-3' |

| <b>Antibody</b>            | <b>Manufacturer</b>                |
|----------------------------|------------------------------------|
| phospho-FRS2               | Cell Signaling Technologies, #3864 |
| phospho-ERK1/2             | Cell Signaling Technologies, #4370 |
| total-ERK1/2               | Cell Signaling Technologies, #9101 |
| alpha-tubulin              | Abcam, ab4074                      |
| Anti-rabbit 800CW          | Li-Cor, 925-32213                  |
| Anti-mouse 680RD           | Li-Cor, 925-68072                  |
| HRP-conjugated anti-rabbit | Abcam, ab6721                      |
| Anti-FGFR1                 | Abcam, ab10646                     |
| Anti-FGFR2                 | Abcam, ab10648                     |
| Anti-FGFR3                 | Santa Cruz, sc-13121               |
| Anti-FGFR4                 | Santa Cruz, sc-124                 |

**Supplementary Table S3.**

**Patient information and tumor characteristics.** Classification of the tumor samples by a pathologist. The data includes artificial patient ID, age, cancer type and grade, lymph node status, observed metastasis (yes/no), and ER (%), PR (%), HER2 (yes/no) expression, and results from Ki67 staining (%) at tumor dissection by a clinical pathologist.

| <b>Patient ID</b> | <b>Tumor classification</b> |                |              |                   | <b>Expression in tumor</b> |               |             |                 |
|-------------------|-----------------------------|----------------|--------------|-------------------|----------------------------|---------------|-------------|-----------------|
|                   | <b>Type</b>                 | <b>Gradius</b> | <b>Nodes</b> | <b>Metastasis</b> | <b>ER (%)</b>              | <b>PR (%)</b> | <b>HER2</b> | <b>Ki67 (%)</b> |
| <b>1</b>          | Ductal                      | 3              | 0            | No                | 70                         | 95            | No          | 65              |
| <b>2</b>          | Ductal                      | 3              | 2/50         | Yes               | 90                         | 90            | No          | 9               |
| <b>3</b>          | Ductal                      | 2              | 0/12         | No                | 99                         | 95            | No          | 30              |
| <b>4</b>          | Lobular                     | 2              | 29/35        | Yes               | 98                         | 98            | No          | 30              |
| <b>5</b>          | Ductal                      | 2              | 3/27         | Yes               | 95                         | 20            | Yes         | 9               |
| <b>6</b>          | Ductal                      | 2              | 3/15         | Yes               | 90                         | 98            | Yes         | 30              |
| <b>7</b>          | Ductal                      | 2              | 3/8          | Yes               | 98                         | 98            | No          | 30              |
| <b>8</b>          | Lobular                     | 2              | 0/8          | No                | 99                         | 95            | No          | 15              |
| <b>9</b>          | Lobular                     | 2              | 0/8          | No                | 95                         | 45            | No          | 29              |
| <b>10</b>         | Lobular                     | 2              | 0/8          | No                | 98                         | 95            | No          | 12              |

### Supplementary Figure S1.

**MCF-7, MDA-MB-231(SA), and MFM223 cells treated with TKI258, BGJ398, and AZD4547.** MCF-7, MDA-MB-231(SA) and MFM223 cells were treated with TKI258, BGJ398 and AZD4547 at the indicated concentrations for 70 h. IncuCyte ZOOM microscope imaging was used to monitor cell proliferation in real-time and representative images at the 70 h point are shown.

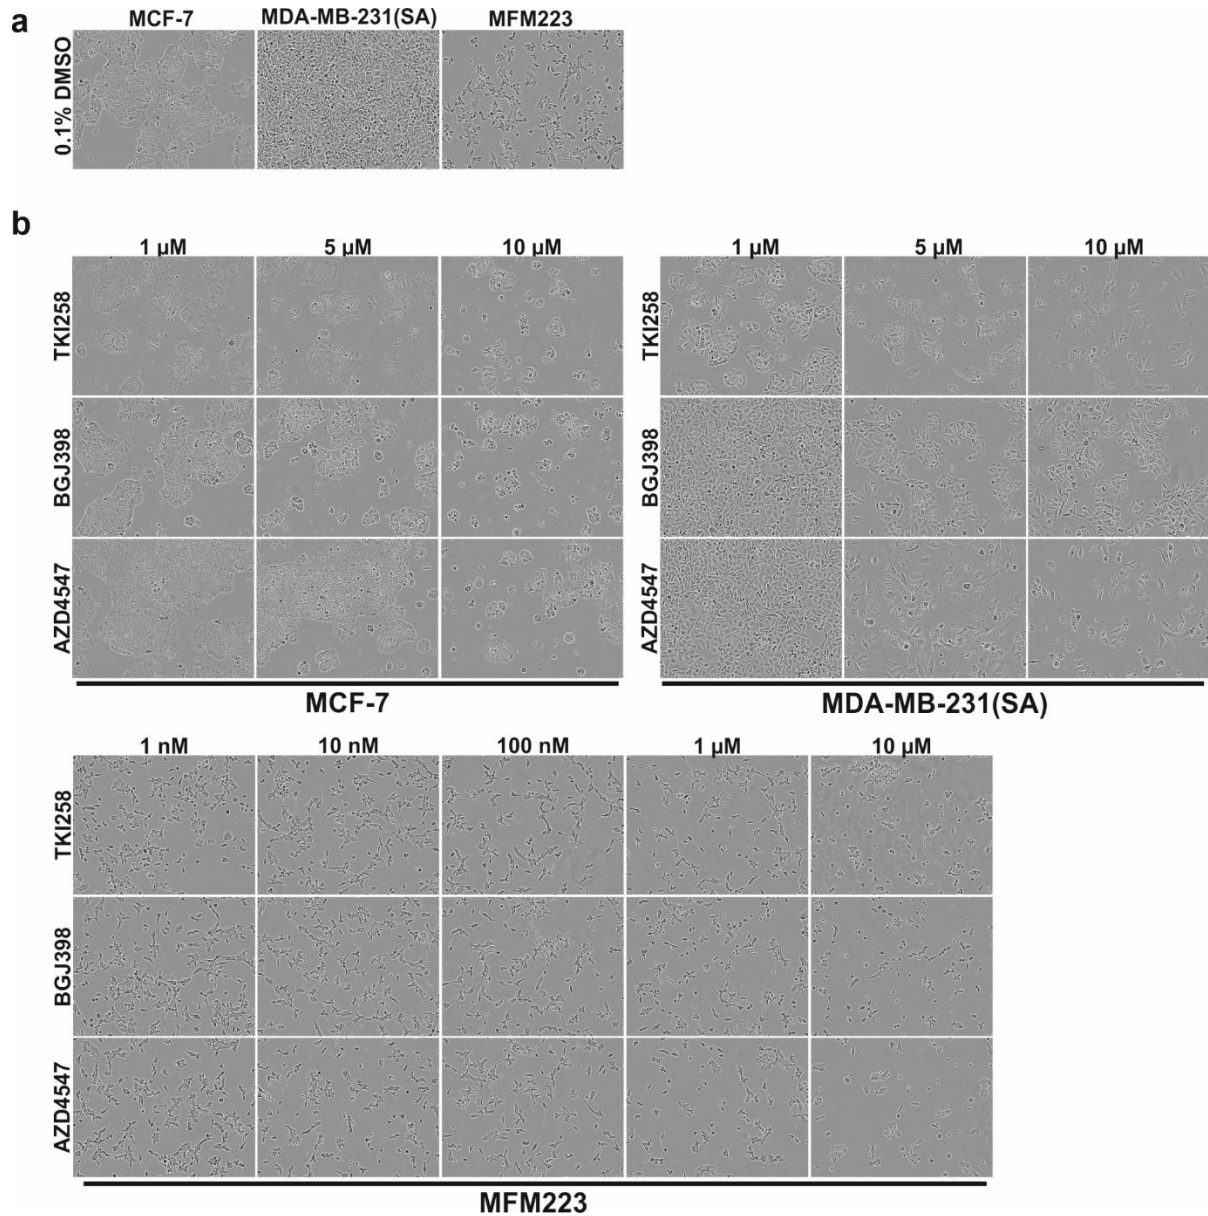

## Supplementary Figure S2.

**Combination of FGFRis with irradiation.** MCF-7 or MDA-MB-231(SA) cells (2000/well) were treated with 1 or 5  $\mu$ M, and MFM223 cells (10000/well) with 10 nM or 1  $\mu$ M of FGFRis for 24 h and then irradiated with 0 or 4 Gy X-ray. Medium was changed to FGFRi-free medium after 24 h, and cell viability measured 48 h later (left). Alternatively, cells were first irradiated with 0 or 4 Gy of X-ray and the treatment with FGFRis was started 48 h after irradiation. Medium was changed to FGFRi-free medium after 24 h, and cell viability measured 48h later (right). Cell viability (% of untreated control, mean  $\pm$  SD, n=3-4) after each treatment in non-irradiated (0 Gy, white bars) and irradiated (4 Gy, black bars) cells. Cells exposed to both FGFRi and irradiation (black) were compared to the vehicle-treated cells exposed to irradiation alone (gray bars, dotted line). Statistical significances are shown for One-Way ANOVA, with Dunnett's test for multiple comparison ( $p < 0.05^*$ ,  $p < 0.01^{**}$ ,  $p < 0.001^{***}$ ).

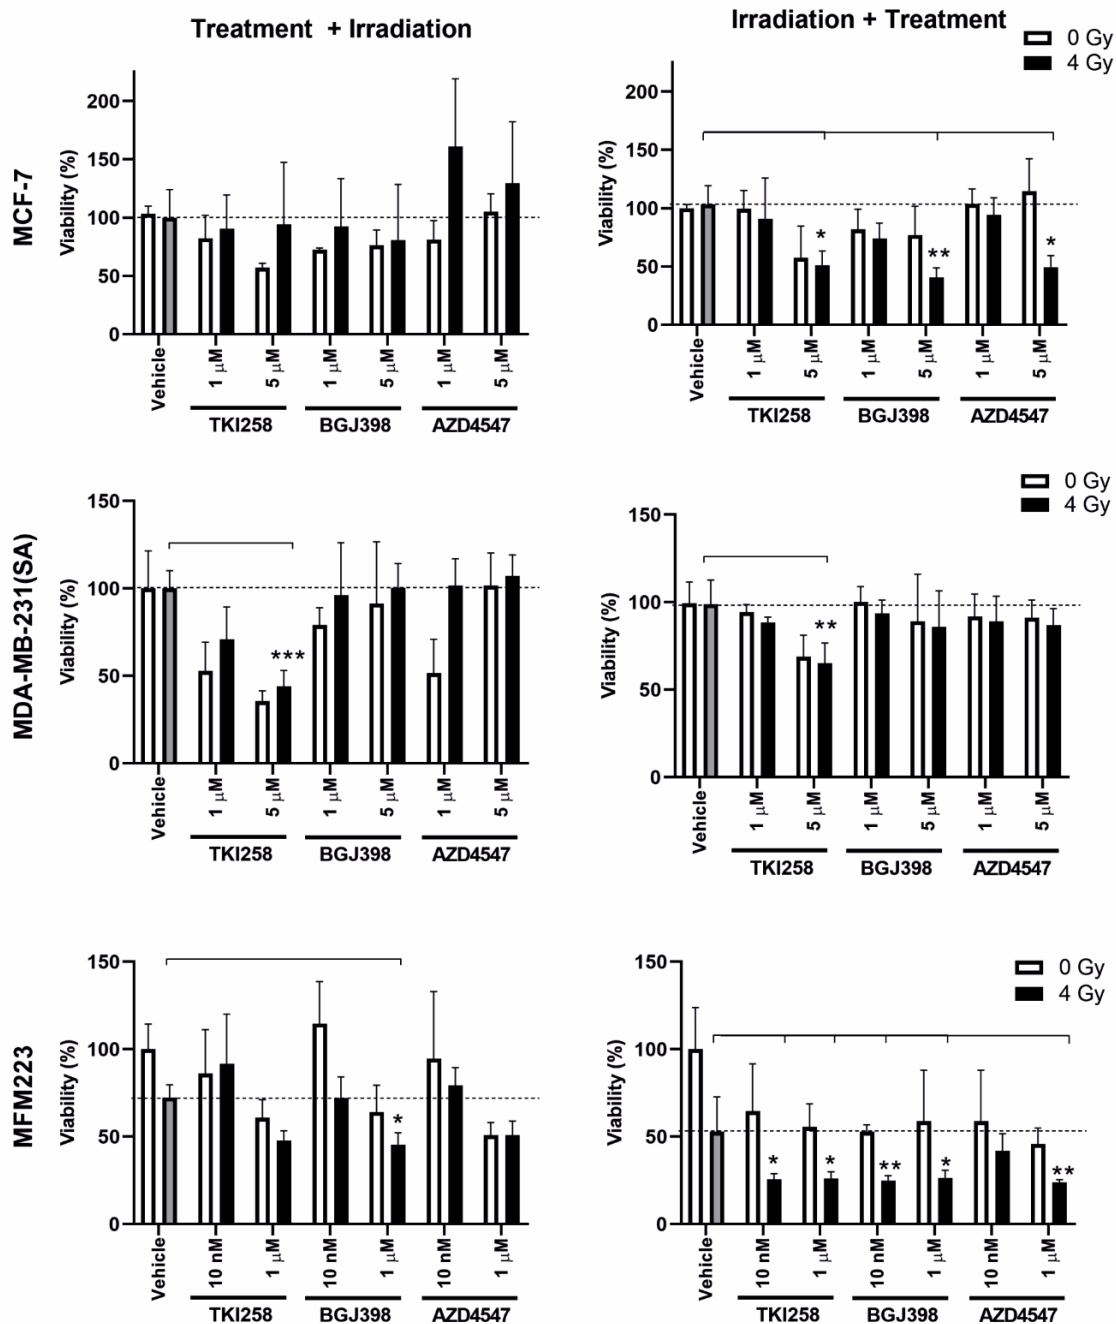

### Supplementary Figure S3.

**Confocal imaging of organotypic 3D cultures and the morphometric image analysis.** A) At the endpoint of cultures, organotypic 3D cultures were stained with Calcein-AM (green) and EthD1 (red) to visualize live and dead cells in organoids, respectively. The organoids were imaged with a confocal microscope with 5x objective, and representative images are shown. B) Maximum projections were segmented and analyzed using AMIDA-software. Example images of the segmentations are shown.

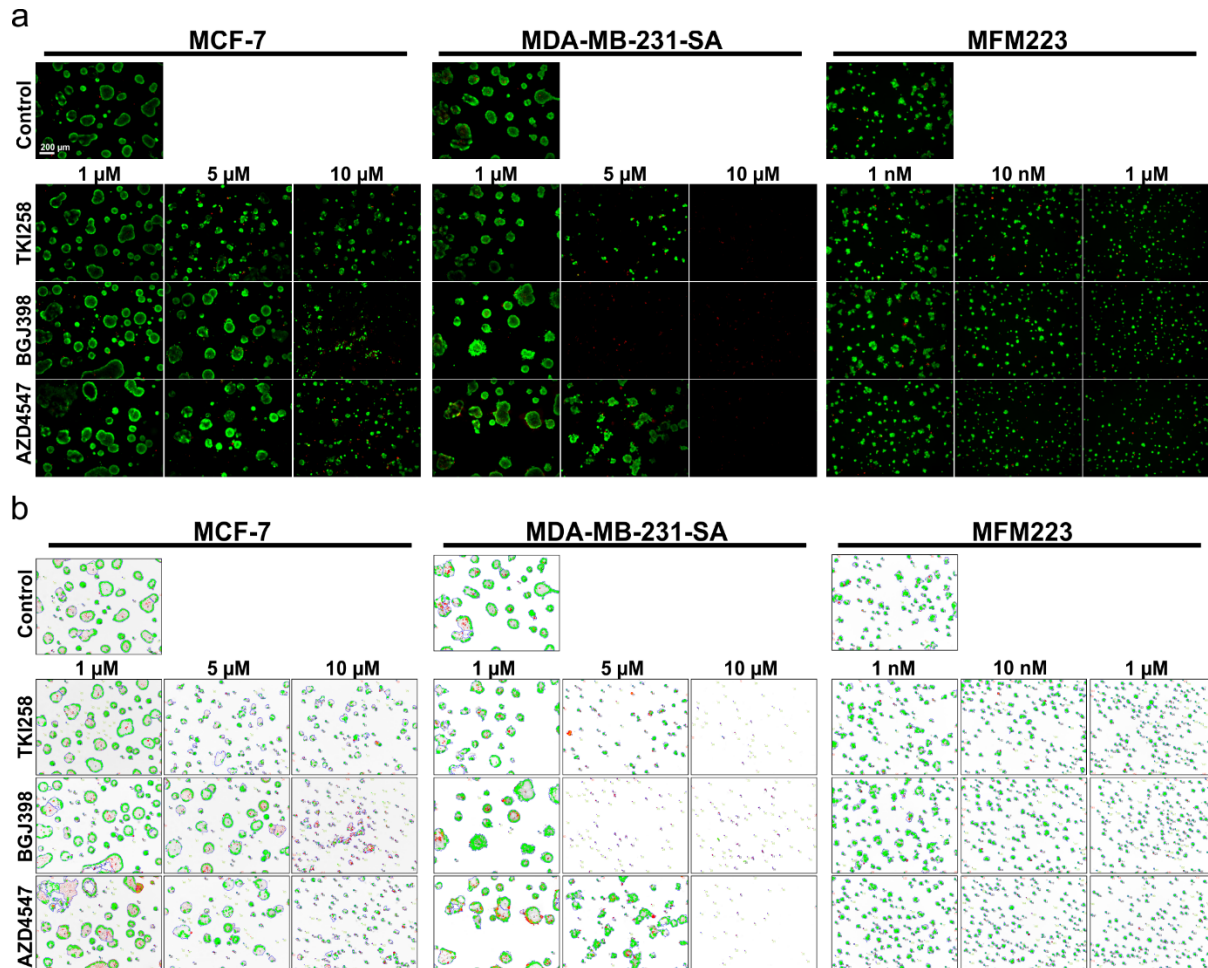

Supplement: 13402_2020_562_MOESM1_ESM.pdf [file 13402_2020_562_MOESM1_ESM.pdf]
